# Supplementary material
Source: Springer Nature journal article supplement (https://www.springermedizin.de/resource/supplementary/12985_2009_655_MOESM2_ESM.pdf/9608204)

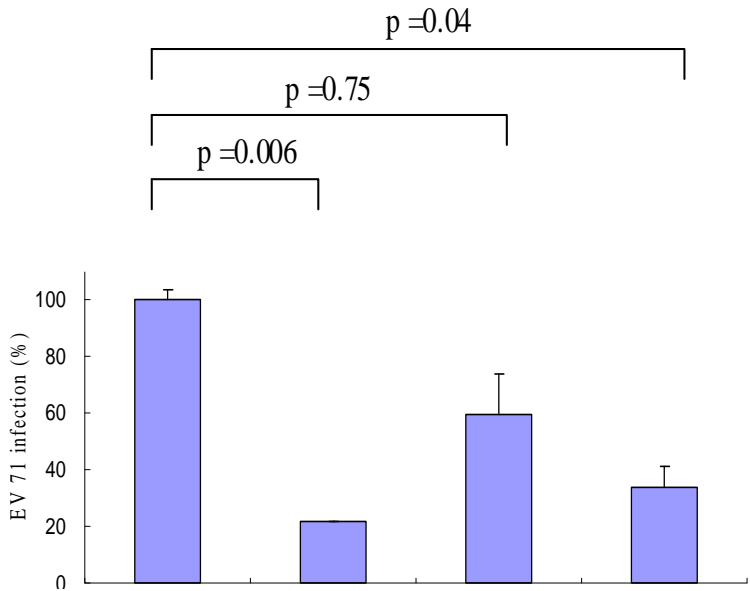

|                          |   |   |   |   |
|--------------------------|---|---|---|---|
| EV 71                    | + | + | + | + |
| Benzyl- $\alpha$ -GalNAc | - | + | - | - |
| Tunicamycin              | - | - | + | - |
| Phospholipase C          | - | - | - | + |

Supplement: MOESM2 [file 9608204]
